# Supplementary material
Source: PubMed Central journal article supplement (PMC3578992)

**Supplemental Figure 1.** Absolute fat mass (A) and lean mass (B) in FCG mice (cross A) (compare to Fig 2AB).

**Supplemental Figure 2.** Absolute fat mass (A) and lean mass (B) in cross B mice 19 weeks after gonadectomy (compare to Fig 3BC).

**Supplemental Figure 3.** Absolute fat and lean mass and absolute organ weights in cross B mice after 16 weeks of high fat diet.

**Table 1: Primers**

| Gene        | Forward 5'to 3'         | Reverse 5'to 3'       |
|-------------|-------------------------|-----------------------|
| <i>B2m</i>  | TGGTGCTTGTCTCACTGACC-3' | GTATGTTTCGGCTTCCCATTC |
| <i>Tbp</i>  | ACCCTTCACCAATGACTCCTATG | ATGATGACTGCAGCAAATCGC |
| BC022960    | ATCCCCAAGATCATCAGCAG'   | TTCGGTAGCCCACTTGCTTT  |
| <i>Hk2</i>  | GAAGATGATCAGCGGGATGT    | TCTGGATTCCGTCCTTATG   |
| <i>Pdk4</i> | CTGTCAGAGTTTGTAGACACG   | GACTACTGCTACCACATCACA |

# Supplemental figure 1

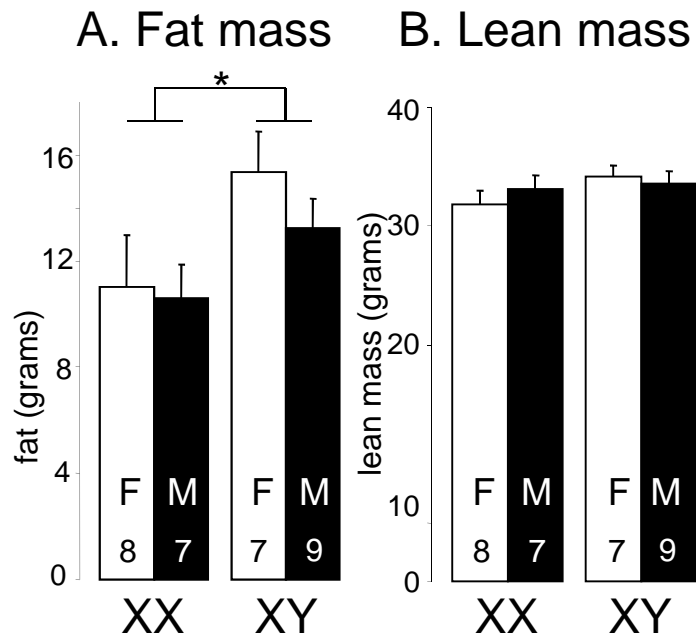

## Supplemental figure 2

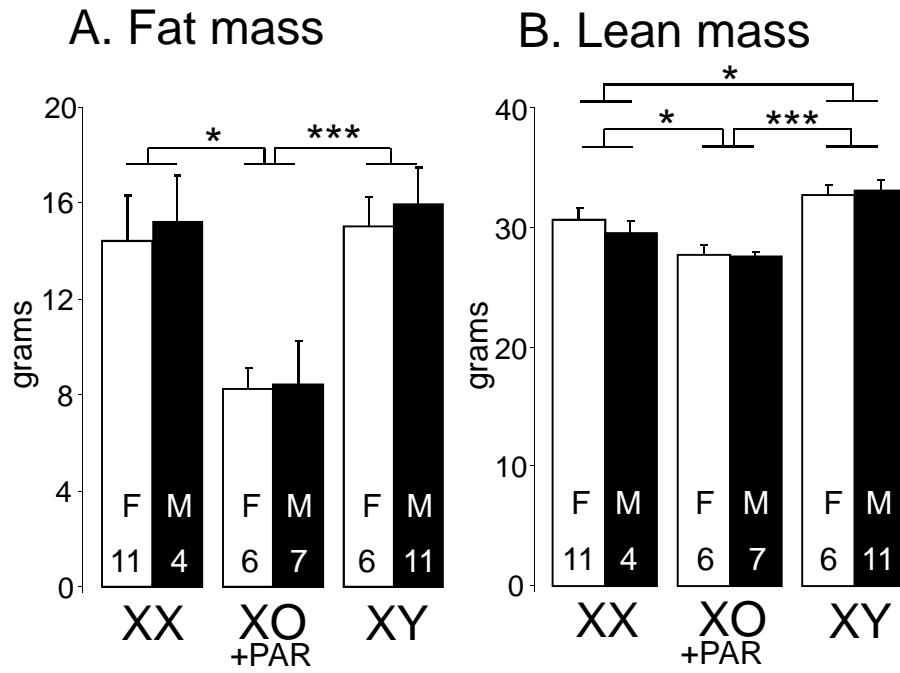

### Supplemental figure 3

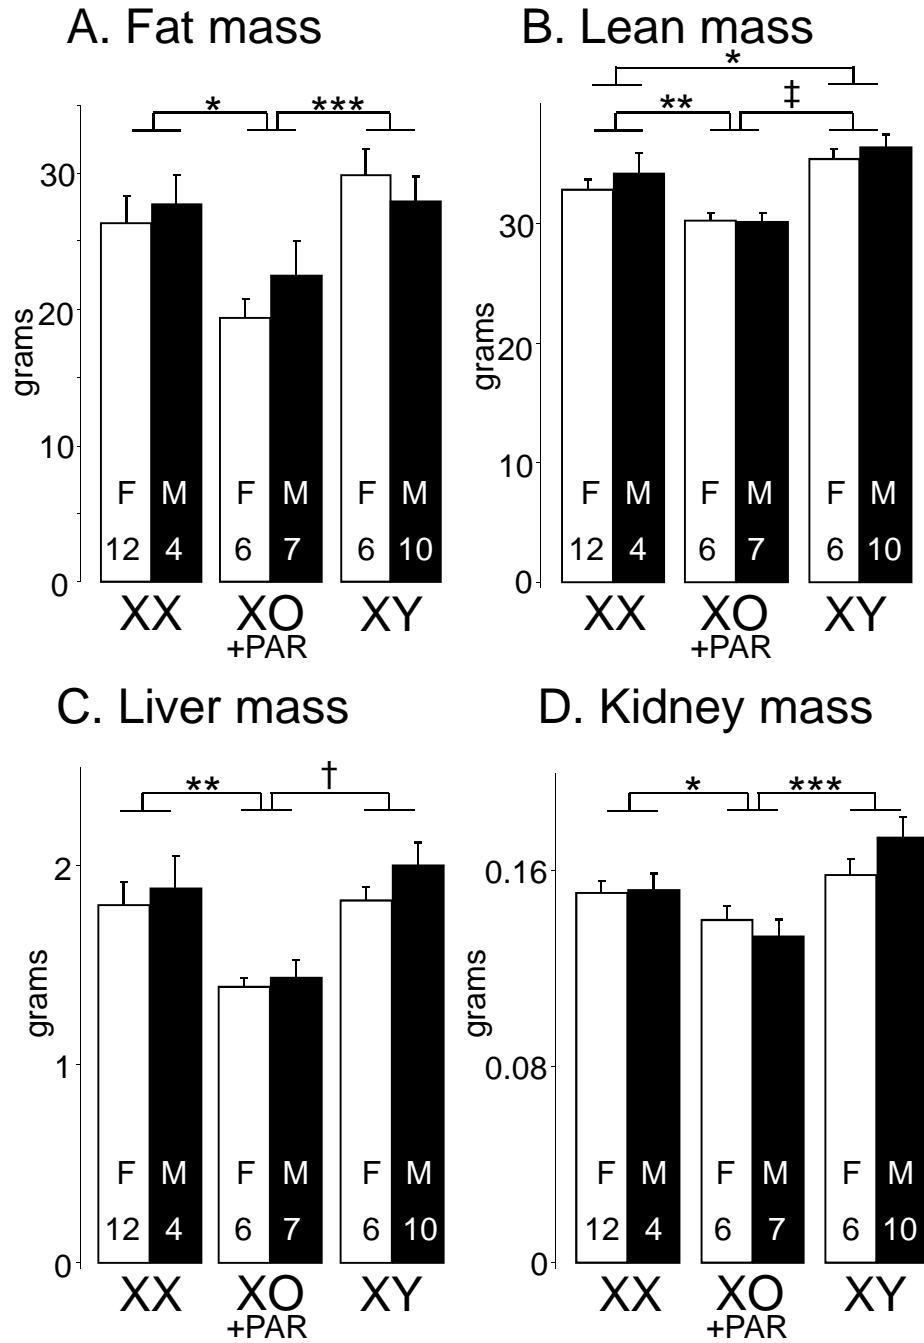

Supplement: supp_en.2012-2098_EN-12-2098Suppfiles.pdf [file supp_en.2012-2098_EN-12-2098Suppfiles.pdf]
